# Supplementary material for: Rare, hypodentate L-κS coordination mode of N,N-dialkyl-N′-aroylthioureas leads to unprecedented mixed-ligand [Pt(phen)(L-κS)2] complexes
Source: Royal Society of Chemistry journal article supplement (doi:10.1039/c7nj03178e), 2017-01-01
Supplement: c7nj03178e2.pdf [file c7nj03178e2.pdf]

### Supplementary Data

## Rare, Hypodentate L-κS Coordination Mode of *N,N*-dialkyl-*N'*-aroylthioureas leads to Unprecedented Mixed-ligand [Pt(phen)(L-κS)<sub>2</sub>] Complexes.

Izak A. Kotzé, Edmore F. Kangara, Vincent J. Smith and Klaus R. Koch

**Fig. S1.** <sup>1</sup>H NMR spectra (a) of a sample of purified [Pt(phen)(L<sup>1</sup>-κO,S)]<sup>+</sup> as the chloride salt, in CDCl<sub>3</sub> and (b) the isolated crude reaction mixture obtained in the attempted synthesis of (a) containing a significant amount of the previously 'unknown' [Pt(phen)(L<sup>1</sup>-κS)<sub>2</sub>]. Expansions are shown for both 'aromatic' and 'aliphatic' proton regions of the <sup>1</sup>H NMR spectrum for clarity, and to highlight the differences in the spectra of these complexes.

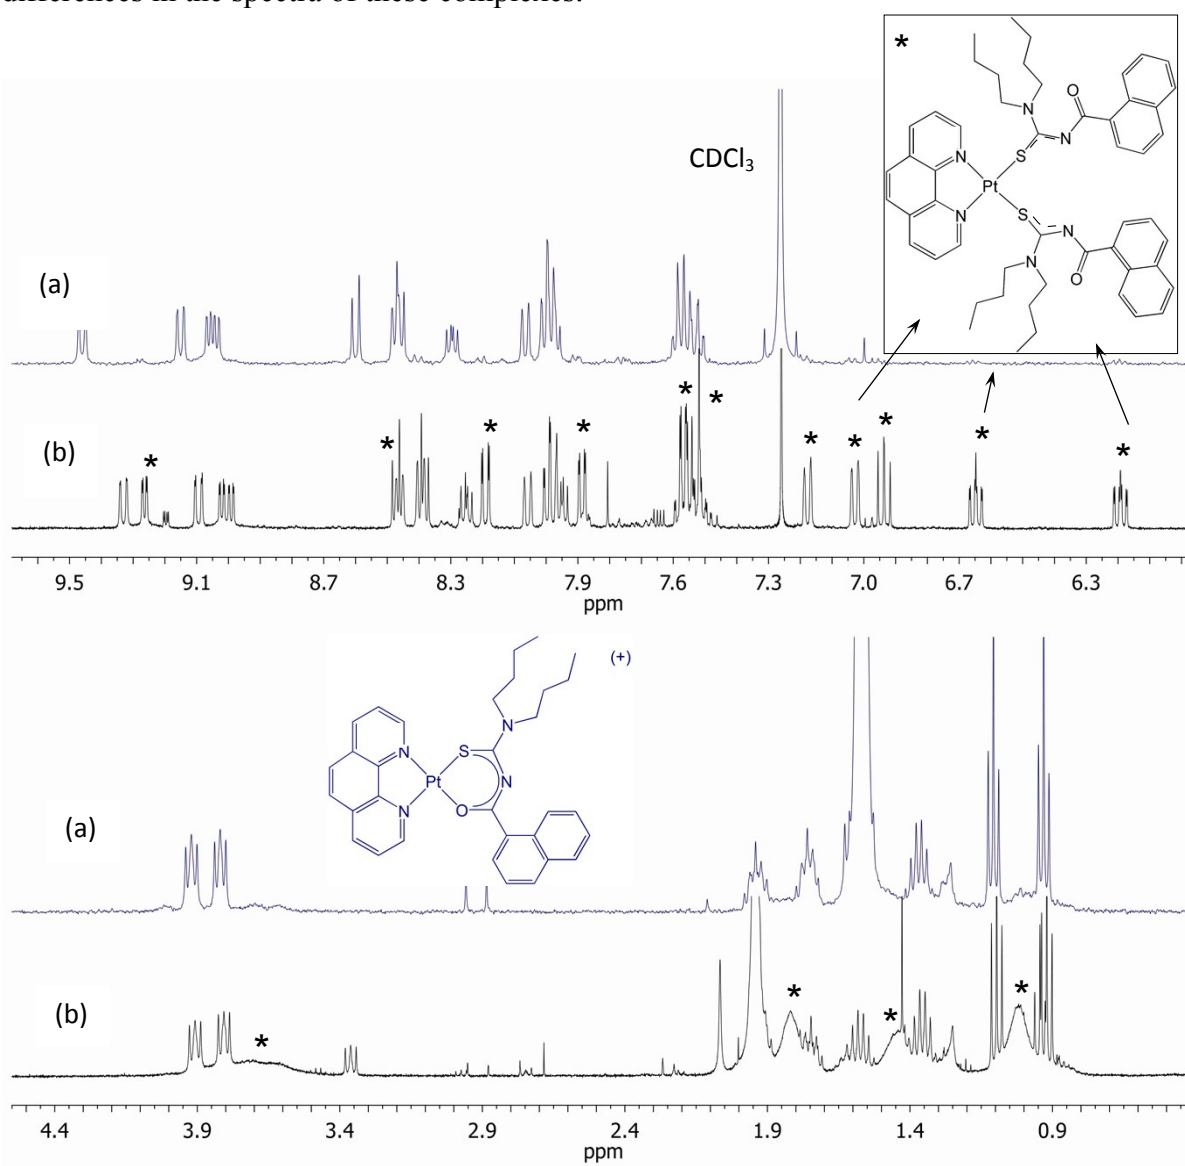

**Fig. S2.** A  $^1\text{H}$  NMR spectrum of an isolated essentially 98% pure sample of  $[\text{Pt}(\text{phen})(\text{L}^1\text{-}\kappa\text{S})_2]$  in chloroform- $d_1$  with assignments (\* traces of ethanol).

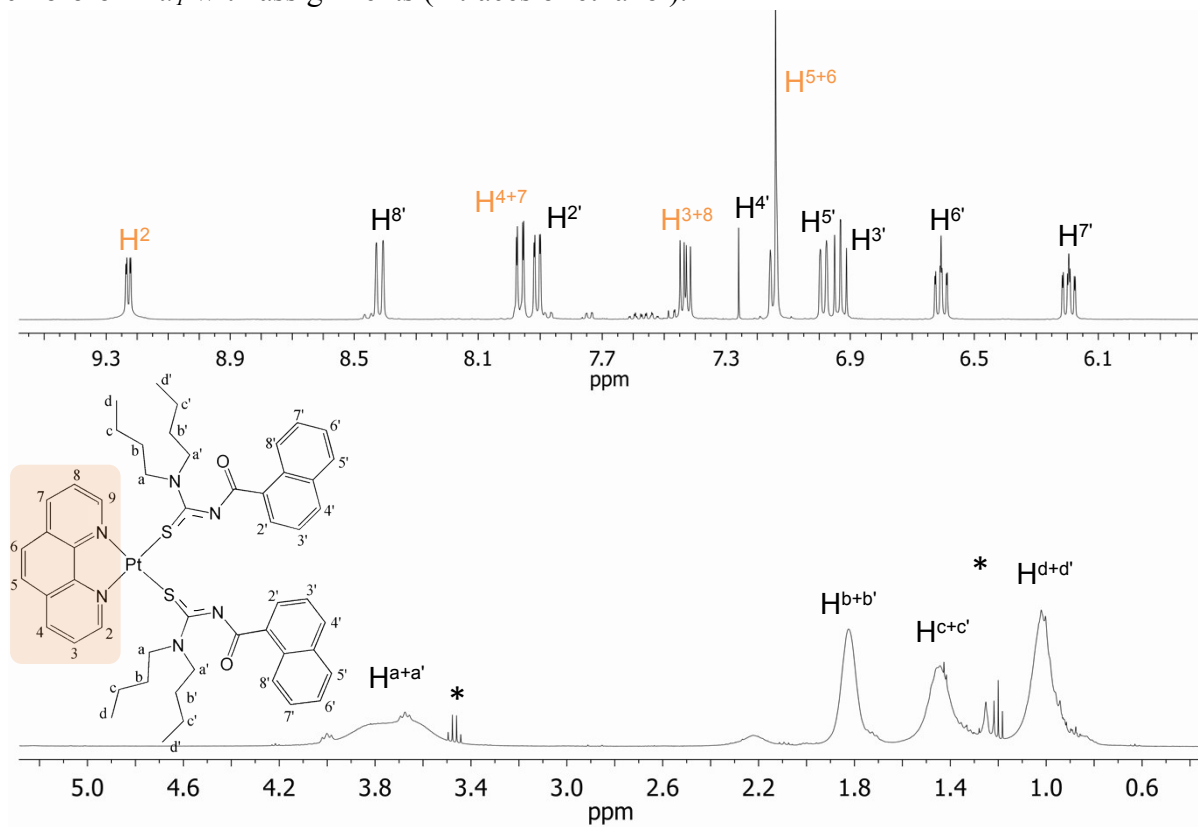

**Fig. S3.** The molecular structure and numbering of  $[\text{Pt}(\text{phen})(\text{L}^1\text{-}\kappa\text{S})_2]$ , highlighting the striking offset *intra*-molecular stacking between the naphthoyl moieties and the  $\text{Pt}(\text{phen})$ -moiety in this complex.

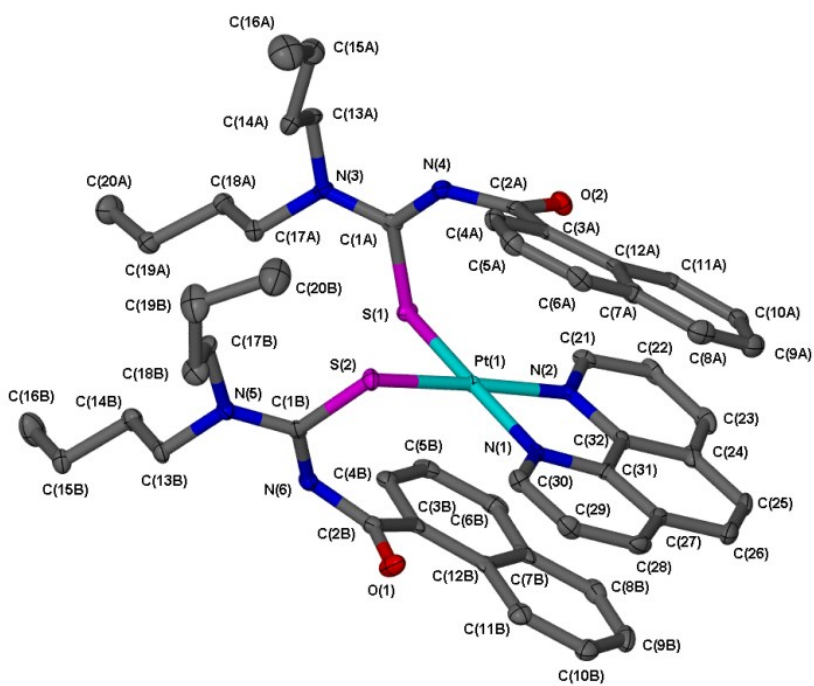

**Fig. S4.** Packing diagram of the crystal structure of  $[\text{Pt}(\text{phen})(\text{L}^1\text{-}\kappa\text{S})_2]$  viewed along the  $b$  axis.

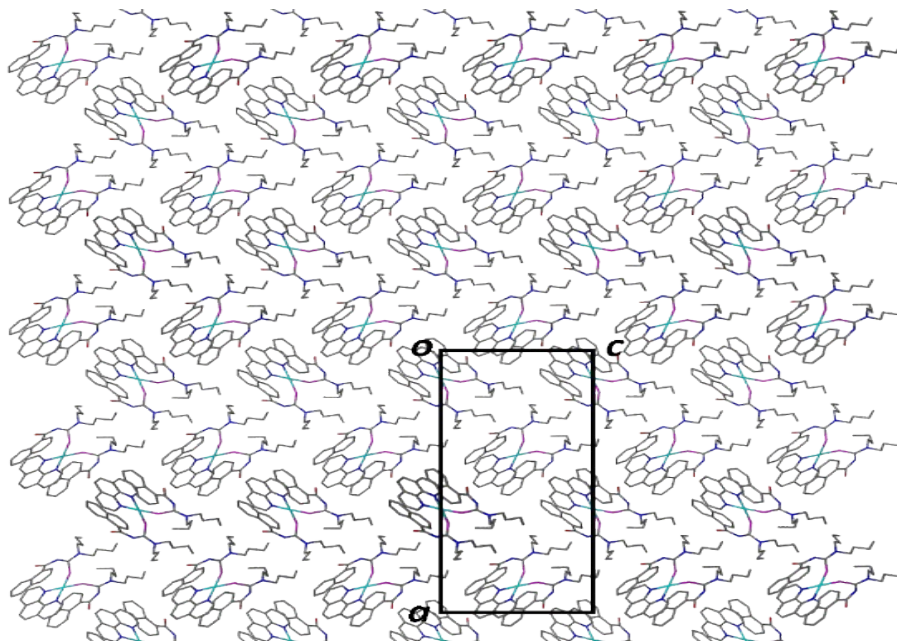

**Table S1.** Selected bond lengths for  $[\text{Pt}(\text{phen})(\text{L}^1\text{-}\kappa\text{S})_2]$ .

| <i>Bonds:</i> | Å         |
|---------------|-----------|
| Pt1-S2        | 2.2838(8) |
| Pt1-N1        | 2.056(2)  |
| Pt1-N2        | 2.056(2)  |
| S1-C1A        | 1.784(3)  |
| S2-C1B        | 1.779(3)  |
| O1-C2B        | 1.225(4)  |
| O2-C2A        | 1.238(3)  |
| N1-C30        | 1.328(3)  |
| N1-C31        | 1.373(4)  |
| N2-C21        | 1.327(4)  |
| N2-C32        | 1.368(5)  |
| N3-C1A        | 1.361(4)  |
| N3-C13A       | 1.459(4)  |
| N3-C17A       | 1.469(4)  |
| N4-C1A        | 1.295(4)  |
| N4-C2A        | 1.362(4)  |
| N5-C1B        | 1.353(4)  |
| N5-C13B       | 1.468(4)  |
| N5-C17B       | 1.471(4)  |
| N6-C1B        | 1.304(4)  |
| N6-C2B        | 1.375(5)  |

**Fig. S5.** A representative portion of an  $^1\text{H}$  NMR spectrum of the isolated product of a reaction of 2.02 eq.  $\text{HL}^3$  with 1 eq. of  $[\text{Pt}(\text{phen})\text{Cl}_2]$  in methanol; Note that the major product is  $[\text{Pt}(\text{phen})(\text{L}^3\text{-}\kappa\text{S},\text{O})]^+\text{Cl}^-$ , while the minor product  $[\text{Pt}(\text{phen})(\text{L}^3\text{-}\kappa\text{S})_2]$  is only formed in a *ca* 9 % overall yield (highlighted  $^1\text{H}$  NMR peaks). Repetition of such synthesis with higher ratios of  $\text{HL}^3$  :  $[\text{Pt}(\text{phen})\text{Cl}_2]$  of up to 4:1, did not result in significantly larger amounts of  $[\text{Pt}(\text{phen})(\text{L}^3\text{-}\kappa\text{S})_2]$  being found upon work up of this relatively unstable product.

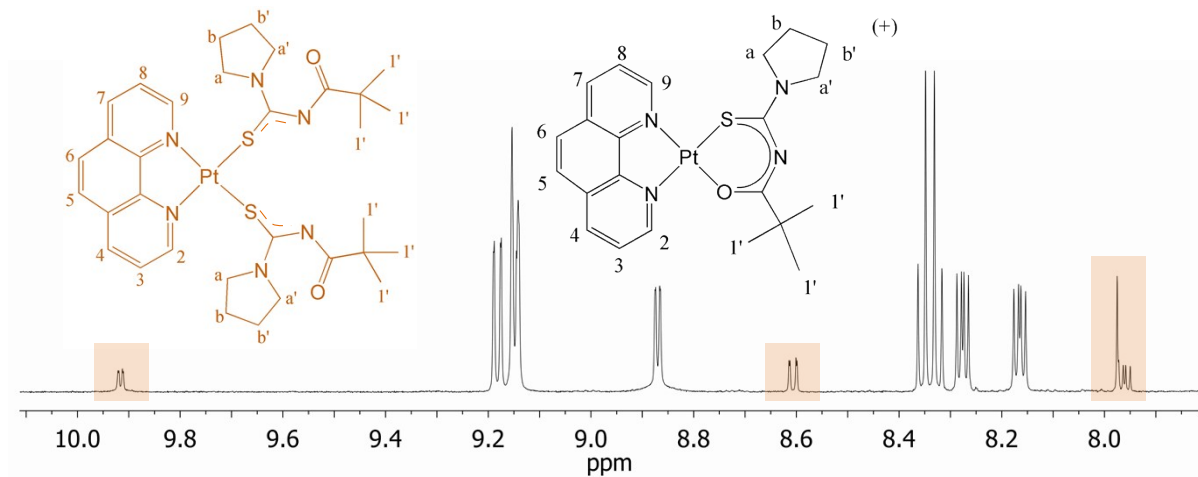

**Fig. S6.** Numbering scheme of selected atoms and groups of the molecular structure of  $[\text{Pt}(\text{phen})(\text{L}^2\text{-}\kappa\text{S})_2]$ . Hydrogen atoms omitted for clarity, with the exception of a water molecule, H-bonded to the pendant  $\text{C}(\text{O})$  group of the phenyl amide moiety of this complex.

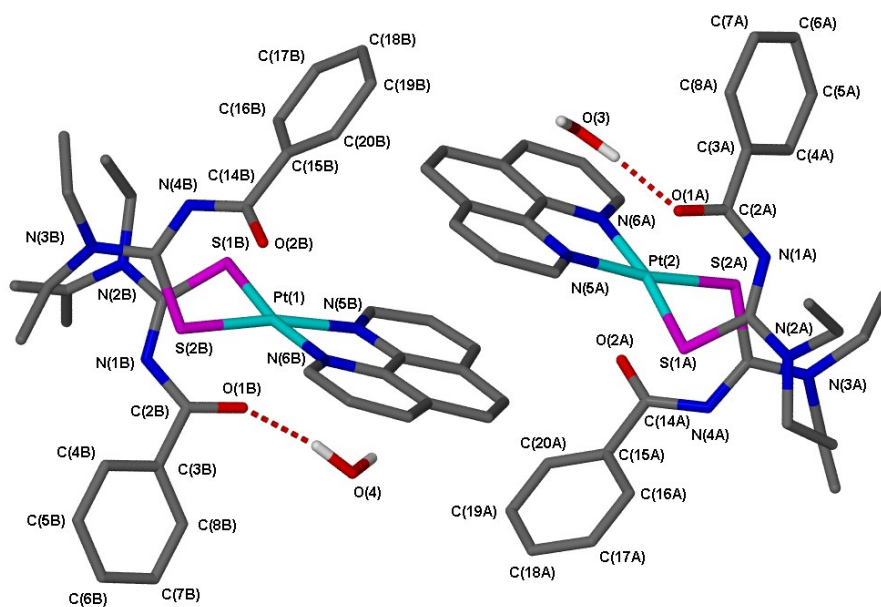

**Table S2.** Selected bond lengths for [Pt(phen)(L<sup>2</sup>-κS)<sub>2</sub>].

| <i>Bonds:</i> | Å         |
|---------------|-----------|
| Pt1-S1B       | 2.280(2)  |
| Pt1-S2B       | 2.280(2)  |
| Pt1-N5B       | 2.060(6)  |
| Pt1-N6B       | 2.050(6)  |
| Pt2-S1A       | 2.279(2)  |
| Pt2-S2A       | 2.284(2)  |
| Pt2-N5A       | 2.057(6)  |
| Pt2-N6A       | 2.063(6)  |
| S1B-C1B       | 1.746(7)  |
| S2B-C13B      | 1.751(8)  |
| S1A-C1A       | 1.741(7)  |
| S2A-C13A      | 1.748(7)  |
| O1B-C2B       | 1.242(9)  |
| O2B-C14B      | 1.233(10) |
| O2A-C14A      | 1.238(9)  |
| O1A-C2A       | 1.242(9)  |
| N1B-C2B       | 1.359(9)  |
| N1B-C1B       | 1.320(9)  |
| N2B-C11B      | 1.474(9)  |
| N2B-C1B       | 1.349(9)  |
| N2B-C9B       | 1.480(9)  |
| N3B-C13B      | 1.343(10) |
| N3B-C17       | 1.511(12) |
| N3B-C14       | 1.472(12) |
| N4B-C13B      | 1.310(10) |
| N4B-C14B      | 1.349(11) |
| N5B-C32B      | 1.365(9)  |
| N5B-C21B      | 1.327(10) |
| N6B-C31B      | 1.369(9)  |
| N6B-C30B      | 1.317(10) |
| N1A-C1A       | 1.320(9)  |
| N1A-C2A       | 1.333(9)  |
| N2A-C1A       | 1.352(9)  |
| N2A-C9A       | 1.480(9)  |
| N2A-C11A      | 1.439(9)  |

**Table S2.** Selected bond lengths for [Pt(phen)(L<sup>2</sup>-κS)<sub>2</sub>].

| <i>Bonds:</i> | Å         |
|---------------|-----------|
| N3A-C13A      | 1.356(9)  |
| N3A-C21A      | 1.516(11) |
| N3A-C23A      | 1.493(9)  |
| N4A-C14A      | 1.353(9)  |
| N4A-C13A      | 1.318(9)  |
| N5A-C25A      | 1.340(10) |
| N5A-C36A      | 1.348(9)  |
| N6A-C34A      | 1.324(10) |
| N6A-C35A      | 1.381(9)  |

**Table S3.** Selected hydrogen bond distanced in [Pt(phen)(L<sup>2</sup>-κS)<sub>2</sub>]

| H-Bond          |         | D...A (Å) | D...A (°) | Symm. Op   |
|-----------------|---------|-----------|-----------|------------|
| O4—HB... O1B    | 1.88(6) | 2.877(8)  | 170(5)    | -x,-y,-z   |
| O4—HA... O2A    | 1.87(3) | 2.837(7)  | 163(7)    | 1-x,-y,-z  |
| O3-- H3A... O2B | 1.93(5) | 2.914(8)  | 167(6)    | 1-x,-y,-z  |
| O3-- H3B... O1A | 1.83(7) | 2.812(8)  | 168(6)    | 1-x,1-y,-z |
